# Supplementary material for: Ancient diversification of eukaryotic MCM DNA replication proteins
Source: PubMed Central journal article supplement (PMC2667178; doi:10.1186/1471-2148-9-60), 2009-03-17
Supplement: 1471-2148-9-60-S1.pdf [file 1471-2148-9-60-S1.pdf]

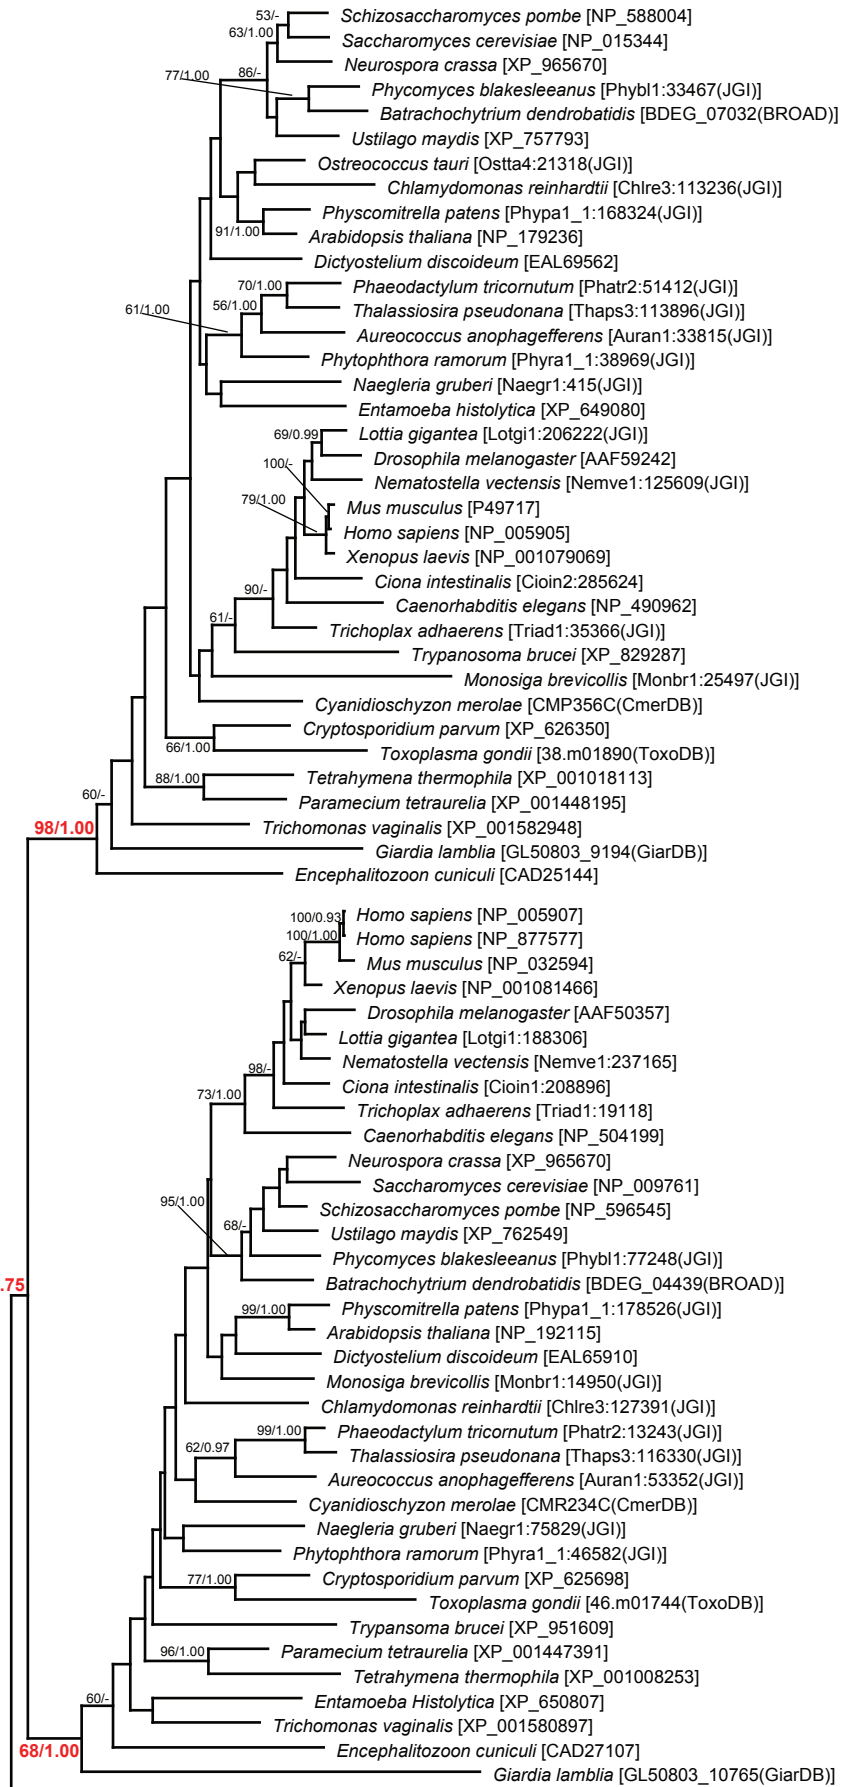

Mcm4

Mcm7

Mcm 5, 6, 3, 2, 8, 9  
+ Archaea MCMs
