# Supplementary material for: Ancient diversification of eukaryotic MCM DNA replication proteins
Source: PubMed Central journal article supplement (PMC2667178; doi:10.1186/1471-2148-9-60), 2009-03-17
Supplement: 1471-2148-9-60-S2.pdf [file 1471-2148-9-60-S2.pdf]

25/0.75

Mcm 4, 7

19/-

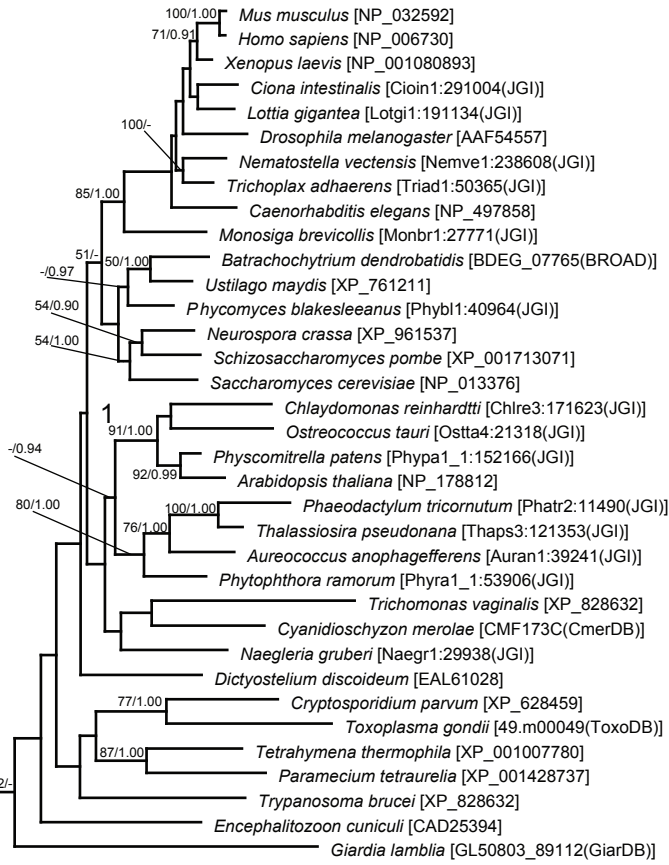

Mcm5

71/-

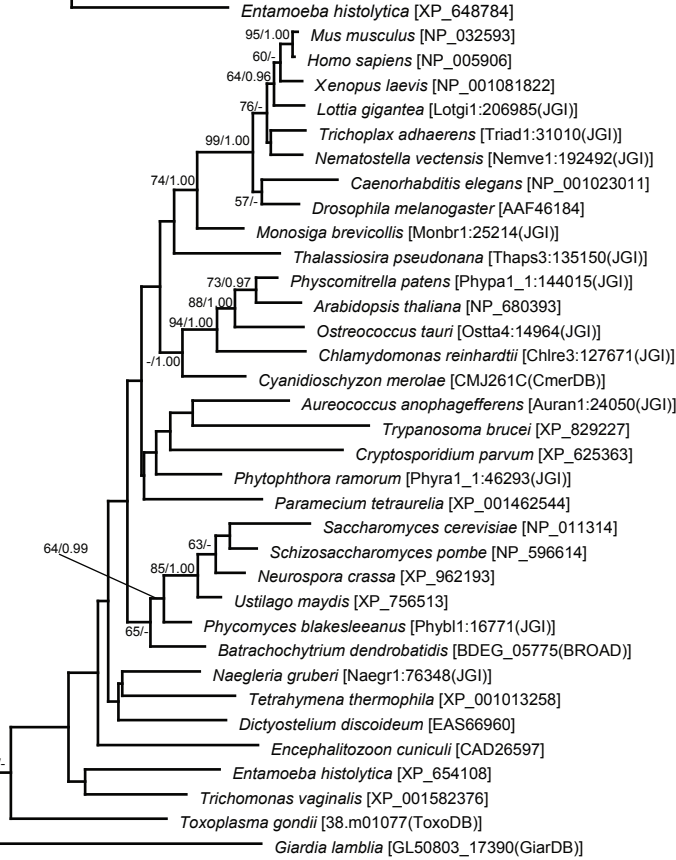

Mcm6

18/-

74/1.00

92/1.00

Mcm 3

Mcm 2, 8, 9 + Archaea MCMs
